# Supplementary material for: Transplant Coordinators' Perceived Impact of Availability of Multiple Generic Immunosuppression Therapies on Patients, Workload, and Posttransplant Maintenance Therapy
Source: Hindawi journal article supplement (doi:10.1155/2013/897434), 2013-01-01
Supplement: f1 [file 897434.f1.pdf]

***Myfortic Transplant Coordinator  
Survey: Defining the perceptions  
of generic mycophenolate mofetil***

**July 28, 2010**

**Prepared for:**

Steve Arcona, PhD  
Director, Outcomes Research  
Novartis Pharmaceuticals Corporation

---

**Please direct comments and questions to:**

Jay Jackson, PharmD, MPH  
Vice President, Medical Services  
Xcenda  
4114 Woodlands Parkway, Suite 500  
Palm Harbor, FL 34685  
Phone: 727-771-4133  
Fax: 727-771-4145  
Email: [jay.jackson@xcenda.com](mailto:jay.jackson@xcenda.com)

Amanda Gilmore, PhD, MPH  
Director, Medical Services  
Xcenda  
4114 Woodlands Parkway, Suite 500  
Palm Harbor, FL 34685  
Phone: 504-267-0442  
Fax: 727-771-4145  
Email: [amanda.gilmore@xcenda.com](mailto:amanda.gilmore@xcenda.com)

| Coordinator Demographics        |                                                                                                                                                                                                                                                                                                                                                       |
|---------------------------------|-------------------------------------------------------------------------------------------------------------------------------------------------------------------------------------------------------------------------------------------------------------------------------------------------------------------------------------------------------|
| 1.                              | How many solid organ transplants are performed annually at your transplant center?<br><input type="checkbox"/> 10-25 <input type="checkbox"/> 26-50 <input type="checkbox"/> 51-75 <input type="checkbox"/> 76-100 <input type="checkbox"/> 101-200 <input type="checkbox"/> >200                                                                     |
| 2.<br>(screening question)      | Do you participate directly in the management of transplant recipients' outpatient immunosuppression?<br><input type="checkbox"/> Yes <input type="checkbox"/> No                                                                                                                                                                                     |
| 3.                              | How many years have you worked with transplant patients?<br><input type="checkbox"/> ≤1 year <input type="checkbox"/> 2-3 years <input type="checkbox"/> 4-5 years <input type="checkbox"/> >5 years                                                                                                                                                  |
| 4.                              | Which of the following describes your primary job function<br><input type="checkbox"/> RN <input type="checkbox"/> CRNP <input type="checkbox"/> PA <input type="checkbox"/> MD <input type="checkbox"/> PharmD <input type="checkbox"/> RPh <input type="checkbox"/> DO <input type="checkbox"/> Other                                               |
| Understanding Patient Confusion |                                                                                                                                                                                                                                                                                                                                                       |
| 5.                              | How often do patients in your practice ask questions regarding their immunosuppressant therapy?<br><input type="checkbox"/> Every visit <input type="checkbox"/> Some visits <input type="checkbox"/> By phone in between visits <input type="checkbox"/> Never                                                                                       |
| 6.                              | In general, rate your transplant patient's level of confusion regarding their immunosuppression regimen?<br>1—Completely confused <span style="float: right;">5—No confusion</span>                                                                                                                                                                   |
| 7.                              | How many phone calls do you answer per day from patients who have confusion regarding their immunosuppression therapy?<br><input type="checkbox"/> 0 <input type="checkbox"/> 1 <input type="checkbox"/> 2 <input type="checkbox"/> 3 <input type="checkbox"/> 4 <input type="checkbox"/> 5 <input type="checkbox"/> >5                               |
| 8.                              | How many phone calls do you answer per day from caregivers who have confusion regarding a transplant recipients' immunosuppression therapy?<br><input type="checkbox"/> 0 <input type="checkbox"/> 1 <input type="checkbox"/> 2 <input type="checkbox"/> 3 <input type="checkbox"/> 4 <input type="checkbox"/> 5 <input type="checkbox"/> >5          |
| 9.                              | What proportion of your total transplant patient population is at least somewhat confused about their immunosuppression?<br><input type="checkbox"/> <5% <input type="checkbox"/> 6-10% <input type="checkbox"/> 11-25% <input type="checkbox"/> 26-50% <input type="checkbox"/> 51-75% <input type="checkbox"/> 76-90% <input type="checkbox"/> >90% |

|                                       |                                                                                                                                                                                                                                                                                                                                                                                                                                                                                                                                                                                                                                                                                                                                                                                                                                                                                                                                                                                                           |
|---------------------------------------|-----------------------------------------------------------------------------------------------------------------------------------------------------------------------------------------------------------------------------------------------------------------------------------------------------------------------------------------------------------------------------------------------------------------------------------------------------------------------------------------------------------------------------------------------------------------------------------------------------------------------------------------------------------------------------------------------------------------------------------------------------------------------------------------------------------------------------------------------------------------------------------------------------------------------------------------------------------------------------------------------------------|
|                                       |                                                                                                                                                                                                                                                                                                                                                                                                                                                                                                                                                                                                                                                                                                                                                                                                                                                                                                                                                                                                           |
| 10.                                   | <p>Rate the below factors based on how much each contributes to a transplant recipient's confusion regarding their immunosuppressant therapy.<br/>1—Is not a contributor to patient confusion    5—Is a main contributor to patient confusion</p> <ul style="list-style-type: none"> <li><input type="checkbox"/> Pill Color, Shape, Marking</li> <li><input type="checkbox"/> Change in strength</li> <li><input type="checkbox"/> Heavy pill burden</li> <li><input type="checkbox"/> Total number of medications in immunosuppressant regimen</li> <li><input type="checkbox"/> &gt;1 generic medication in the immunosuppressant regimen</li> <li><input type="checkbox"/> Switching from branded to generic medications</li> <li><input type="checkbox"/> Switching from generic to branded</li> <li><input type="checkbox"/> Switching from one generic treatment to another generic</li> <li><input type="checkbox"/> Switching from one branded treatment to another branded treatment</li> </ul> |
|                                       |                                                                                                                                                                                                                                                                                                                                                                                                                                                                                                                                                                                                                                                                                                                                                                                                                                                                                                                                                                                                           |
| 11.                                   | <p>Are there certain patient factors that tend to increase the level of confusion surrounding the immunosuppressant regimen?</p> <p><input type="checkbox"/> Yes    <input type="checkbox"/> No</p> <p>If yes, please describe (free text).</p> <hr/> <hr/>                                                                                                                                                                                                                                                                                                                                                                                                                                                                                                                                                                                                                                                                                                                                               |
| <b>Impact on Coordinator Workload</b> |                                                                                                                                                                                                                                                                                                                                                                                                                                                                                                                                                                                                                                                                                                                                                                                                                                                                                                                                                                                                           |
|                                       |                                                                                                                                                                                                                                                                                                                                                                                                                                                                                                                                                                                                                                                                                                                                                                                                                                                                                                                                                                                                           |
| 12.                                   | <p>Estimate how many hours per week you spend on the phone with the following groups discussing immunosuppressant therapy-related issues?</p> <p>0 hours    ½ hour    1 hour    1 ½ hours    2 hours    2 – 5 hours    &gt;5 hours</p> <p><input type="checkbox"/> Patients    <input type="checkbox"/> Caregivers    <input type="checkbox"/> Pharmacies    <input type="checkbox"/> Other HCPs    <input type="checkbox"/> Insurers/Health Plans</p>                                                                                                                                                                                                                                                                                                                                                                                                                                                                                                                                                    |
|                                       |                                                                                                                                                                                                                                                                                                                                                                                                                                                                                                                                                                                                                                                                                                                                                                                                                                                                                                                                                                                                           |
| 13.                                   | <p>On average, how long is a recipient's clinic visit time in the first year following transplantation?</p> <p><input type="checkbox"/> &lt;30 minutes    <input type="checkbox"/> 30 minutes to 1 hour    <input type="checkbox"/> &gt;1 hour to 1.5 hours    <input type="checkbox"/> &gt;1.5 hours</p> <p>On average, how much of the total post-transplant clinic visit time is spent on educating the patient about his/her immunosuppressant therapy?</p> <p><input type="checkbox"/> &lt;5%    <input type="checkbox"/> 6-10%    <input type="checkbox"/> 11-25%    <input type="checkbox"/> 26-50%    <input type="checkbox"/> 51-75%    <input type="checkbox"/> 76-90%    <input type="checkbox"/> &gt;90%</p>                                                                                                                                                                                                                                                                                  |
|                                       |                                                                                                                                                                                                                                                                                                                                                                                                                                                                                                                                                                                                                                                                                                                                                                                                                                                                                                                                                                                                           |
| 14.                                   | <p>Which of the following best describes your practice in terms of patient education initiatives? (Pick one.)</p> <ul style="list-style-type: none"> <li><input type="checkbox"/> Patient education initiatives have remained the same over the past year.</li> <li><input type="checkbox"/> Patient education initiatives have increased over the past year and are gaining more importance.</li> <li><input type="checkbox"/> Patient education initiatives have increased over the past year but are becoming less important.</li> <li><input type="checkbox"/> Patient education initiatives have decreased over the past year but are gaining more importance.</li> </ul>                                                                                                                                                                                                                                                                                                                            |

[illegible]

|                                                   |                                                                                                                                                                                                                                                                                                                                                                                                                                                                                                                                                                                                                                                                                                                                                                                                                                                                                                                                                                                                                                                                                                                                                                                                                                                                                                                                                                                                                                                                               |
|---------------------------------------------------|-------------------------------------------------------------------------------------------------------------------------------------------------------------------------------------------------------------------------------------------------------------------------------------------------------------------------------------------------------------------------------------------------------------------------------------------------------------------------------------------------------------------------------------------------------------------------------------------------------------------------------------------------------------------------------------------------------------------------------------------------------------------------------------------------------------------------------------------------------------------------------------------------------------------------------------------------------------------------------------------------------------------------------------------------------------------------------------------------------------------------------------------------------------------------------------------------------------------------------------------------------------------------------------------------------------------------------------------------------------------------------------------------------------------------------------------------------------------------------|
|                                                   |                                                                                                                                                                                                                                                                                                                                                                                                                                                                                                                                                                                                                                                                                                                                                                                                                                                                                                                                                                                                                                                                                                                                                                                                                                                                                                                                                                                                                                                                               |
| 22.                                               | How many generic versions of mycophenolate mofetil are currently available?<br><input type="checkbox"/> 0 <input type="checkbox"/> 1 <input type="checkbox"/> 2 <input type="checkbox"/> 3 <input type="checkbox"/> 4 <input type="checkbox"/> 5 <input type="checkbox"/> >5                                                                                                                                                                                                                                                                                                                                                                                                                                                                                                                                                                                                                                                                                                                                                                                                                                                                                                                                                                                                                                                                                                                                                                                                  |
|                                                   |                                                                                                                                                                                                                                                                                                                                                                                                                                                                                                                                                                                                                                                                                                                                                                                                                                                                                                                                                                                                                                                                                                                                                                                                                                                                                                                                                                                                                                                                               |
| 23.                                               | How many generic versions of tacrolimus are currently available?<br><input type="checkbox"/> 0 <input type="checkbox"/> 1 <input type="checkbox"/> 2 <input type="checkbox"/> 3 <input type="checkbox"/> 4 <input type="checkbox"/> 5 <input type="checkbox"/> >5                                                                                                                                                                                                                                                                                                                                                                                                                                                                                                                                                                                                                                                                                                                                                                                                                                                                                                                                                                                                                                                                                                                                                                                                             |
|                                                   |                                                                                                                                                                                                                                                                                                                                                                                                                                                                                                                                                                                                                                                                                                                                                                                                                                                                                                                                                                                                                                                                                                                                                                                                                                                                                                                                                                                                                                                                               |
| 24.                                               | Overall, what proportion of transplant recipients in your center has switched from branded Prograf® to a generic tacrolimus product?<br><input type="checkbox"/> <5% <input type="checkbox"/> 6-10% <input type="checkbox"/> 11-25% <input type="checkbox"/> 26-50% <input type="checkbox"/> 51-75% <input type="checkbox"/> 76-90% <input type="checkbox"/> >90% <input type="checkbox"/> Do not know<br><br>Overall, what proportion of transplant recipients in your center has switched from branded Cellcept® to a generic MMF product?<br><input type="checkbox"/> <5% <input type="checkbox"/> 6-10% <input type="checkbox"/> 11-25% <input type="checkbox"/> 26-50% <input type="checkbox"/> 51-75% <input type="checkbox"/> 76-90% <input type="checkbox"/> >90% <input type="checkbox"/> Do not know                                                                                                                                                                                                                                                                                                                                                                                                                                                                                                                                                                                                                                                                |
|                                                   |                                                                                                                                                                                                                                                                                                                                                                                                                                                                                                                                                                                                                                                                                                                                                                                                                                                                                                                                                                                                                                                                                                                                                                                                                                                                                                                                                                                                                                                                               |
| 25.                                               | Which of the following best describes your workload since the introduction of generic immunosuppressants? (Pick one.)<br><br><input type="checkbox"/> My workload has increased as a result of new generic immunosuppressants.<br><input type="checkbox"/> My workload has decreased as a result of new generic immunosuppressants.<br><input type="checkbox"/> My workload has remained the same with new generic immunosuppressants.<br><input type="checkbox"/> I don't know.<br><br>Which of the following best describes your workload since the introduction of multiple generic MMF products? (Pick one.)<br><br><input type="checkbox"/> My workload has increased as a result of new generic immunosuppressants.<br><input type="checkbox"/> My workload has decreased as a result of new generic immunosuppressants.<br><input type="checkbox"/> My workload has remained the same with new generic immunosuppressants.<br><input type="checkbox"/> I don't know.<br><br>Which of the following best describes your workload since the introduction of multiple generic tacrolimus products? (Pick one.)<br><br><input type="checkbox"/> My workload has increased as a result of new generic immunosuppressants.<br><input type="checkbox"/> My workload has decreased as a result of new generic immunosuppressants.<br><input type="checkbox"/> My workload has remained the same with new generic immunosuppressants.<br><input type="checkbox"/> I don't know. |
|                                                   |                                                                                                                                                                                                                                                                                                                                                                                                                                                                                                                                                                                                                                                                                                                                                                                                                                                                                                                                                                                                                                                                                                                                                                                                                                                                                                                                                                                                                                                                               |
| 26.                                               | Describe how your workload has changed since the introduction of generic immunosuppressant medications?                                                                                                                                                                                                                                                                                                                                                                                                                                                                                                                                                                                                                                                                                                                                                                                                                                                                                                                                                                                                                                                                                                                                                                                                                                                                                                                                                                       |
| <b>Interruptions in Immunosuppressant Therapy</b> |                                                                                                                                                                                                                                                                                                                                                                                                                                                                                                                                                                                                                                                                                                                                                                                                                                                                                                                                                                                                                                                                                                                                                                                                                                                                                                                                                                                                                                                                               |
|                                                   |                                                                                                                                                                                                                                                                                                                                                                                                                                                                                                                                                                                                                                                                                                                                                                                                                                                                                                                                                                                                                                                                                                                                                                                                                                                                                                                                                                                                                                                                               |
| 27.                                               | Please rate each of the following factors based on its level of significance in the decision to substitute a generic immunosuppressant for a branded immunosuppressant.<br>1—Not significant <span style="float: right;">5—Very significant</span>                                                                                                                                                                                                                                                                                                                                                                                                                                                                                                                                                                                                                                                                                                                                                                                                                                                                                                                                                                                                                                                                                                                                                                                                                            |

|     |                                                                                                                                                                                                                                                                                                                                                                                                                                                                                                                                                                                                                                                                                                                                                                                                                                                                                                                                                                                                                                                                            |
|-----|----------------------------------------------------------------------------------------------------------------------------------------------------------------------------------------------------------------------------------------------------------------------------------------------------------------------------------------------------------------------------------------------------------------------------------------------------------------------------------------------------------------------------------------------------------------------------------------------------------------------------------------------------------------------------------------------------------------------------------------------------------------------------------------------------------------------------------------------------------------------------------------------------------------------------------------------------------------------------------------------------------------------------------------------------------------------------|
|     | <input type="checkbox"/> Patient preference <input type="checkbox"/> Adverse reactions <input type="checkbox"/> Reimbursement price<br><input type="checkbox"/> Patient out-of-pocket amount (i.e., copay) <input type="checkbox"/> Physician autonomy <input type="checkbox"/> Monitoring parameters <input type="checkbox"/> Efficacy Studies <input type="checkbox"/> Economic studies / models <input type="checkbox"/> Therapeutic Index                                                                                                                                                                                                                                                                                                                                                                                                                                                                                                                                                                                                                              |
| 28. | <p>Since the introduction of generic immunosuppressants, has your team reviewed any efficacy studies for generic agents in transplant patients?</p> <p><input type="checkbox"/> Yes      <input type="checkbox"/> No      <input type="checkbox"/> Do not know</p> <p>If yes, did those studies influence prescribing patterns for immunosuppressant therapy?</p> <p><input type="checkbox"/> Yes      <input type="checkbox"/> No      <input type="checkbox"/> Do not know</p> <p>If no, would your practice review efficacy studies for generic immunosuppressant therapy?</p> <p><input type="checkbox"/> Yes      <input type="checkbox"/> No      <input type="checkbox"/> Do not know</p>                                                                                                                                                                                                                                                                                                                                                                           |
| 29. | <p>There are currently 9 generic MMF products on the market. Rate each of the below factors based on your perception of their likelihood of occurring, due to the availability of multiple generic products.<br/> 1—Not Likely                                  5—Very Likely</p> <p><input type="checkbox"/> Poor patient adherence    <input type="checkbox"/> Missed doses    <input type="checkbox"/> Acute rejection rate    <input type="checkbox"/> Rate of graft loss<br/> <input type="checkbox"/> Mortality rate</p> <p>There are currently several generic tacrolimus products on the market. Rate each of the below factors based on your perception of their likelihood of occurring, due to the availability of multiple generic products.<br/> 1—Not Likely                                  5—Very Likely</p> <p><input type="checkbox"/> Poor patient adherence    <input type="checkbox"/> Missed doses    <input type="checkbox"/> Acute rejection rate    <input type="checkbox"/> Rate of graft loss<br/> <input type="checkbox"/> Mortality rate</p> |
| 30. | <p>Transplant patients in our center are encouraged to bring their medications to every office visit for adherence monitoring and patient education.</p> <p><input type="checkbox"/> Yes      <input type="checkbox"/> No      <input type="checkbox"/> Do not know</p>                                                                                                                                                                                                                                                                                                                                                                                                                                                                                                                                                                                                                                                                                                                                                                                                    |
| 31. | <p>What percentage of patients in your practice actually bring their immunosuppressant medications with them during office visits?</p> <p><input type="checkbox"/> &lt;5%    <input type="checkbox"/> 6-10%    <input type="checkbox"/> 11-25%    <input type="checkbox"/> 26-50%    <input type="checkbox"/> 51-75%    <input type="checkbox"/> 76-90%    <input type="checkbox"/> &gt;90%    <input type="checkbox"/> Do not know</p>                                                                                                                                                                                                                                                                                                                                                                                                                                                                                                                                                                                                                                    |
| 32. | <p>Check all of the following that apply to your transplant center. Patients are instructed to call the office if any of the following occur:</p> <p><input type="checkbox"/> Missed dose    <input type="checkbox"/> Pharmacy changes their prescription to a different generic<br/> <input type="checkbox"/> Pharmacy changes their prescription from generic to brand<br/> <input type="checkbox"/> Pharmacy changes their prescription from brand to generic<br/> <input type="checkbox"/> Experience an adverse event    <input type="checkbox"/> Another doctor prescribes medicine<br/> <input type="checkbox"/> Patient desires to use OTC medicine</p>                                                                                                                                                                                                                                                                                                                                                                                                            |

|     |                                                                                                                                                                                                                                                                                                                                                                                                                                                                                                                                                                                                                                                                                                                                |
|-----|--------------------------------------------------------------------------------------------------------------------------------------------------------------------------------------------------------------------------------------------------------------------------------------------------------------------------------------------------------------------------------------------------------------------------------------------------------------------------------------------------------------------------------------------------------------------------------------------------------------------------------------------------------------------------------------------------------------------------------|
|     |                                                                                                                                                                                                                                                                                                                                                                                                                                                                                                                                                                                                                                                                                                                                |
|     |                                                                                                                                                                                                                                                                                                                                                                                                                                                                                                                                                                                                                                                                                                                                |
| 33. | <p>How many transplant patients at your center experience adverse events during maintenance immunosuppression therapy?</p> <p><input type="checkbox"/> &lt;5%   <input type="checkbox"/> 6-10%   <input type="checkbox"/> 11-25%   <input type="checkbox"/> 26-50%   <input type="checkbox"/> 51-75%   <input type="checkbox"/> 76-90%   <input type="checkbox"/> &gt;90%   <input type="checkbox"/> Do not know</p>                                                                                                                                                                                                                                                                                                           |
|     |                                                                                                                                                                                                                                                                                                                                                                                                                                                                                                                                                                                                                                                                                                                                |
| 34. | <p>Check all of the following that apply to your patients. Over the past year, have you observed an increase in any of the following adverse events in patients who are taking generic MMF.</p> <p><input type="checkbox"/> Anemia   <input type="checkbox"/> Gastritis   <input type="checkbox"/> GI (Diarrhea, constipation, nausea, dyspepsia)   <input type="checkbox"/> GI bleed<br/> <input type="checkbox"/> Headache   <input type="checkbox"/> Leukopenia   <input type="checkbox"/> Neutropenia   <input type="checkbox"/> Rash   <input type="checkbox"/> Tremor   <input type="checkbox"/> Graft Loss   <input type="checkbox"/> Acute Rejection   <input type="checkbox"/> Increased Patient Confusion</p>        |
|     |                                                                                                                                                                                                                                                                                                                                                                                                                                                                                                                                                                                                                                                                                                                                |
| 35. | <p>Check all of the following that apply to your patients. Over the past year, have you observed an increase in any of the following adverse events in patients who are taking generic tacrolimus.</p> <p><input type="checkbox"/> Anemia   <input type="checkbox"/> Gastritis   <input type="checkbox"/> GI (Diarrhea, constipation, nausea, dyspepsia)   <input type="checkbox"/> GI bleed<br/> <input type="checkbox"/> Headache   <input type="checkbox"/> Leukopenia   <input type="checkbox"/> Neutropenia   <input type="checkbox"/> Rash   <input type="checkbox"/> Tremor   <input type="checkbox"/> Graft Loss   <input type="checkbox"/> Acute Rejection   <input type="checkbox"/> Increased Patient Confusion</p> |
